# Supplementary material for: LPS Response Is Impaired by Urban Fine Particulate Matter
Source: MDPI journal article supplement (doi:10.3390/ijms23073913), 2022-04-01
Supplement: s1 [file s1]

## **Supplementary Material**

### **LPS response is impaired by urban fine particulate matter**

Natália de Souza Xavier Costa <sup>1</sup>, Gabriel Ribeiro Júnior <sup>1</sup>, Adair Aparecida dos Santos Alemany <sup>1</sup>, Luciano Belotti <sup>1</sup>, Marcela Frota Cavalcante <sup>2</sup>, Susan Ribeiro <sup>3,4</sup>, Mariana Matera Veras <sup>1</sup>, Esper Georges Kallás <sup>3</sup>, Paulo Hilário Nascimento Saldiva <sup>1</sup>, Marisa Dolhnikoff <sup>1</sup>, Luiz Fernando Ferraz da Silva <sup>1</sup>

<sup>1</sup> Departamento de Patologia, LIM-05, Faculdade de Medicina da Universidade de São Paulo, Avenida Dr. Arnaldo, 455, São Paulo, São Paulo 01246-903, Brazil.

<sup>2</sup> Departamento de Análises Clínicas E Toxicológicas, Faculdade de Ciências Farmacêuticas da, Universidade de São Paulo, São Paulo, São Paulo, Brazil.

<sup>3</sup> Laboratório de Imunologia Clínica E Alergia (LIM60), Faculdade de Medicina da Universidade de São Paulo, São Paulo, São Paulo, Brazil.

<sup>4</sup> Department of Pathology, Case Western Reserve University, Cleveland, OH, USA.

\*Email: nataliasxcosta@usp.br

**Table S1:** Red blood cell count, fibrinogen (mg/dL) and platelet (1000/mm<sup>3</sup>) quantification.

|                                                                       | Control     | PM                      | LPS                   | PM+LPS                   | LPS nebulization | PM2.5 exposure  | Interaction |
|-----------------------------------------------------------------------|-------------|-------------------------|-----------------------|--------------------------|------------------|-----------------|-------------|
| <b>Erythrocytes<br/>(millions/mm<sup>3</sup>)</b>                     | 9.57 (1.02) | 8.8 (0.88) <sup>b</sup> | 10.0 (0.46)           | 8.87 (0.82) <sup>b</sup> | ns               | $p \leq 0.0001$ | $p = 0.018$ |
| <b>Hemoglobin (g/dL)</b>                                              | 15.8 (1.5)  | 14.5 (1.5) <sup>b</sup> | 16.8 (1.0)            | 15.1 (1.7) <sup>b</sup>  | ns               | $p = 0.001$     | ns          |
| <b>Mean corpuscular volume<br/>– MCV (fL)</b>                         | 48.15 (0)   | 47.3 (1) <sup>c</sup>   | 48.15 (1)             | 50 (1)                   | $p = 0.009$      | ns              | $p = 0.008$ |
| <b>Mean corpuscular<br/>hemoglobin – MCH (pg)</b>                     | 16.5 (0.3)  | 16.3 (0.4)              | 16.45 (0.6)           | 17.3 (0.4)               | ns               | ns              | ns          |
| <b>Mean corpuscular<br/>hemoglobin concentration<br/>– MCHC(g/dL)</b> | 34.3 (0.5)  | 34.6 (0.8)              | 34.2 (0.9)            | 34.6 (0.3)               | ns               | ns              | ns          |
| <b>Red Cell Distribution<br/>Width (%)</b>                            | 15.25 (0)   | 15.4 (1)                | 15.55 (1)             | 16.3 (1)                 | ns               | ns              | ns          |
| <b>Hematocrit (%)</b>                                                 | 46.1 (4.9)  | 42.2 (4.1) <sup>b</sup> | 18.7 (1.8)            | 43.7 (3.1) <sup>b</sup>  | ns               | $p = 0.001$     | ns          |
| <b>Fibrinogen (mg/dL)</b>                                             | 285 (70)    | 155 (70) <sup>a</sup>   | 390 (0) <sup>ab</sup> | 190 (0) <sup>ab</sup>    | $p \leq 0.0001$  | $p \leq 0.0001$ | $p = 0.023$ |
| <b>Platelets (1000/mm<sup>3</sup>)</b>                                | 1198 (192)  | 787 (362) <sup>ab</sup> | 1334 (333)            | 1000 (269) <sup>ab</sup> | ns               | $p \leq 0.0001$ | ns          |

Data are expressed in median (interquartile range). ns: not significant. <sup>a</sup>  $p > 0.05$  compared to the control group. <sup>b</sup>  $p > 0.05$  compared to the LPS group. <sup>c</sup>  $p > 0.05$  compared to the PM+LPS.

**Table S2: Primer Sequences**

| Gene          | Forward Sequence       | Reverse Sequence       |
|---------------|------------------------|------------------------|
| <b>RPL13a</b> | AACCTTTGGTCCCCACTTCCCT | TCCTCAAGACCAACGGACTCCT |
| <b>TLR- 2</b> | CAGCTGGAGAACTCTGACCC   | CAAAGAGCCTGAAGTGGGAG   |
| <b>TLR- 4</b> | TCATGGCACTGTTCTTCTCCT  | CATCAGGGACTTTGCTGAGTT  |
| <b>MyD88</b>  | CACCTGTGTCTGGTCCATTG   | AGGCTGAGTGCAAACCTTGGT  |
| <b>FOXp3</b>  | TTCATGCATCAGCTCTCCAC   | CTGGACACCCATTCCAGACT   |

RPL13a: Ribosomal Protein L13a. TLR: Toll-Like Receptor. MyD88: Myeloid differentiation primary response 88. FOXp3: Forkhead box P3.

**Table S3: Immunohistochemistry standards**

|                    | Antibody                                 | Concentration |
|--------------------|------------------------------------------|---------------|
| <b>Neutrophils</b> | Anti – MPO (Abcam – cod. ab9535)         | 1:750         |
| <b>Lymphocytes</b> | Anti - CD3 (Serotec – cod. MCA1477)      | 1:800         |
| <b>Macrophages</b> | Anti - MAC 2 (Cedarlane – cod. CL8942AP) | 1:100,000     |
| <b>IL-1 beta</b>   | Anti – IL-1beta (Santa Cruz – sc-7887)   | 1:400         |
| <b>IL-4</b>        | Anti – IL-4 (Santa Cruz – sc-1260)       | 1:1000        |
| <b>IL-5</b>        | Anti – IL-5 (Santa Cruz – sc-1265)       | 1:1000        |
| <b>IL-6</b>        | Anti – IL-6 (Santa Cruz – sc-1265)       | 1:1500        |
| <b>IL-10</b>       | Anti – IL-10 (Santa Cruz - sc-73309)     | 1:100         |
| <b>IL-17</b>       | Anti – IL-17 (Santa Cruz – sc-6077)      | 1:2000        |
| <b>TNF alpha</b>   | Anti – TNF-alpha (Santa Cruz –sc-1348)   | 1:3000        |

CD3: Cluster of differentiation 3. IL: Interleukin. MPO: Myeloperoxidase. TNF: Tumor necrosis factor.
